# Supplementary material for: Exploring the association between sleep duration and cancer risk in middle-aged and older Chinese adults: observations from a representative cohort study (2011–2020)
Source: PubMed Central journal article supplement (PMC11232271; doi:10.1186/s12889-024-19313-z), 2024-07-08
Supplement: 12889_2024_19313_MOESM1_ESM.pdf [file 12889_2024_19313_MOESM1_ESM.pdf]

|      | Smoking | Education | Drinking | Hypertension | Gender | Diabetics | Dyslipidemia | WC   | BMI  |      |
|------|---------|-----------|----------|--------------|--------|-----------|--------------|------|------|------|
| 8454 | Blue    | Blue      | Blue     | Blue         | Blue   | Blue      | Blue         | Blue | Blue | 0    |
| 86   | Blue    | Blue      | Blue     | Blue         | Blue   | Blue      | Blue         | Blue | Red  | 1    |
| 13   | Blue    | Blue      | Blue     | Blue         | Blue   | Blue      | Blue         | Red  | Blue | 1    |
| 1379 | Blue    | Blue      | Blue     | Blue         | Blue   | Blue      | Blue         | Red  | Red  | 2    |
| 25   | Blue    | Blue      | Blue     | Blue         | Blue   | Blue      | Red          | Blue | Blue | 1    |
| 2    | Blue    | Blue      | Blue     | Blue         | Blue   | Blue      | Red          | Red  | Red  | 3    |
| 5    | Blue    | Blue      | Blue     | Blue         | Blue   | Red       | Blue         | Blue | Blue | 1    |
| 1    | Blue    | Blue      | Blue     | Blue         | Blue   | Red       | Blue         | Blue | Red  | 2    |
| 1    | Blue    | Blue      | Blue     | Blue         | Blue   | Red       | Blue         | Red  | Red  | 3    |
| 10   | Blue    | Blue      | Blue     | Blue         | Blue   | Red       | Red          | Blue | Blue | 2    |
| 7    | Blue    | Blue      | Blue     | Blue         | Red    | Blue      | Blue         | Blue | Blue | 1    |
| 4    | Blue    | Blue      | Blue     | Red          | Blue   | Blue      | Blue         | Red  | Red  | 3    |
| 1    | Blue    | Blue      | Blue     | Red          | Blue   | Blue      | Red          | Red  | Red  | 4    |
| 3    | Blue    | Blue      | Red      | Blue         | Blue   | Blue      | Blue         | Blue | Blue | 1    |
| 1    | Blue    | Blue      | Red      | Blue         | Blue   | Blue      | Blue         | Red  | Red  | 3    |
| 1    | Blue    | Red       | Blue     | Blue         | Blue   | Blue      | Blue         | Blue | Blue | 1    |
| 1    | Blue    | Red       | Blue     | Blue         | Blue   | Blue      | Blue         | Red  | Red  | 3    |
| 1    | Red     | Blue      | Blue     | Blue         | Blue   | Blue      | Blue         | Red  | Red  | 3    |
| 1    | Red     | Blue      | Red      | Blue         | Blue   | Blue      | Blue         | Red  | Red  | 4    |
|      | 2       | 2         | 5        | 5            | 7      | 17        | 38           | 1404 | 1478 | 2958 |
